# Supplementary material for: Inhibition of p38 Mitogen-Activated Protein Kinase Impairs Mayaro Virus Replication in Human Dermal Fibroblasts and HeLa Cells
Source: Preprints.org preprint supplement (doi:10.20944/preprints202104.0670.v1), 2021-04-26
Supplement: Supplementary file 1 [file supplementary]

**Supplementary material**

Inhibition of p38 Mitogen-Activated Protein Kinase Impairs Mayaro Virus Replication in Primary Human Dermal Fibroblasts and HeLa Cells

Madelaine Sugasti 1,2, Yessica Y. Llamas-González 1,3, Dalkiria Campos 1 and José González-Santamaría 1,*

1 Grupo de Biología Celular y Molecular de Arbovirus, Instituto Conmemorativo Gorgas de Estudios de la Salud, Panamá 0816-02593, Panamá; msugasti@gorgas.gob.pa (M.S.); [qfb.y.llamas@gmail.com](mailto:qfb.y.llamas@gmail.com) (Y.Y.L.G.); [dcampos@gorgas.gob.pa](mailto:dcampos@gorgas.gob.pa) (D.C.)

2 Programa de Maestría en Microbiología Ambiental, Universidad de Panamá, Panamá, 3366, Panamá;

3 Programa de Doctorado en Ciencias Biológicas, Universidad de la República, Montevideo 11200, Uruguay

* Correspondence: jgonzalezsantamaria@gorgas.gob.pa; Tel.: +507-527-4814

**Table S1. List of primers used in this study.**

**_______________________________________________________________________________________**

**Gene Primer sequences (5’-3’) References**

**_______________________________________________________________________________________** *MDA5* Forward:GCCATTGCAGATGCAACCAG [1]

Reverse: TTGCGATTTCCTTCTTTTGCAG

*ISG15* Forward: GAGAGGCAGCGAACTCATCT [2]

Reverse: CTTCAGCTCTGACACCGACA

*MxA* Forward:GGTGGTGGTCCCCAGTAATG [3]

Reverse: ACCACGTCCACAACCTTGTCT

*RIG-I* Forward: TGTTCTCAGATCCCTTGGATG [4]

Reverse: CACTGCTCACCAGATTGCAT

*OAS2* Forward: AAACCAGGCCTGTGATCTTG [1]

Reverse: GGGCTATTTCCAGACAACGC

*AIM2* Forward: ATCAGGAGGCTGATCCCAAAG [1]

Reverse: TCTTCATCACTGCAGACACCG

*IL1-β*  Forward: AACCTCTTCGAGGCACAAGG [1]

Reverse: GTCCTGGAAGGAGCACTTCAT

*TNF-⍺* Forward: CAGAGGGAAGAGTTCCCCAGGGACC [5]

Reverse: CCTTGGTCTGGTAGGAGACGG

*IL-6* Forward: TGTGAAAGCAGCAAAGAGGCACTG [4]

Reverse: ACAGCTCTGGCTTGTTCCTCACTA

*RANTES* Forward: GAGGCTTCCCCTCACTATCC [4]

Reverse: CTCAAGTGATCCACCCACCT

*IL-8* Forward: CAGCCAAAACTCCACAGTCA [4]

Reverse: TTGGAGAGCACATAAAAACATCT

*TLR3* Forward: TGGGACCAAGGCAAAGGAGT [1]

Reverse: TTCTCTTGGTTGGGCCACCT

*TLR7*  Forward: AATGTCACAGCCGTCCCTAC [1]

Reverse: TTATTTTTACACGGCGCACA

*IRF3* Forward: GATGCACAGCAGGAGGATTT [1]

Reverse: GATTTTATGTGGGTCGTGAGG

*IRF7* Forward: CAGAGTCTTCTTCCAAGAGCTG [1]

Reverse: TGCTATCCAGGGAAGACACA

IFN-*⍺* Forward: GCCTCGCCCTTTGCTTTACT [5]

Reverse: CTGTGGGTCTCAGGGAGATCA

*IFN-β* Forward: ATGACCAACAAGTGTCTCCTCC [5] Reverse: GCTCATGGAAAGAGCTGTAGTG

*β*-actin Forward: AGAGCTACGAGCTGCCTGAC [6]

Reverse: AGCACTGTGTTGGCGTACAG

__________________________________________________________________________________________


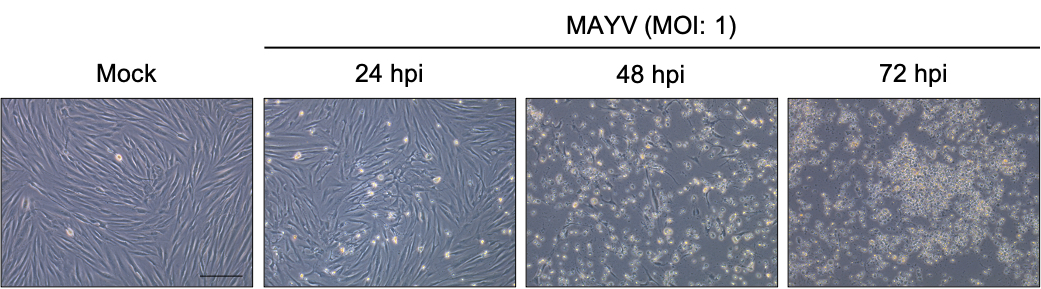


**Figure S1.** Mayaro virus induces a strong, time-dependent cytopathic effect in primary HDFs. HDFs were infected with MAYV at an MOI of 1. At indicated times after infection, images were captured using an inverted microscope and a MCI70-HD camera (Leica). Scale bar: 100 µm.


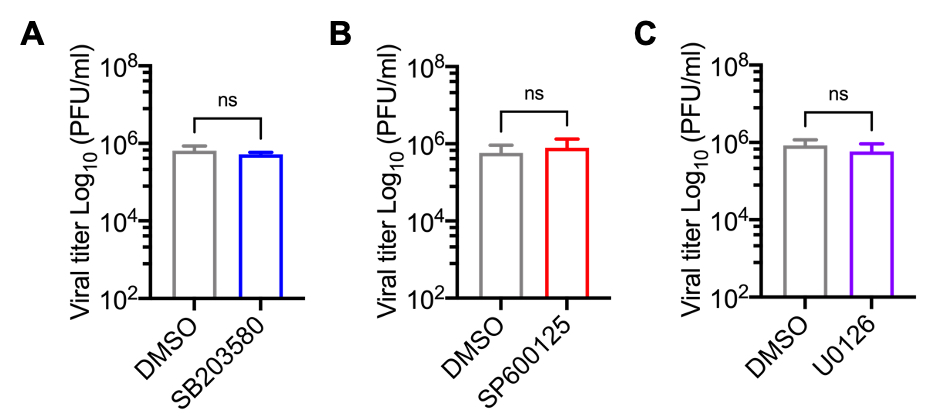


**Figure S2.** MAPK inhibitors SB203580, SP600125 and U0126 show no virucidal activity against MAYV. Aproximately 1 x 106 PFU of MAYV in serum-free MEM were incubated with SB203580 (A), SP600125 (B) or U0126 (C) at 37 ºC for 1 h. Then, the remaining virus for each experimental condition was directly quantified using plaque assay. Statistical differences were analyzed using the Mann-Whitney test: ns: non-significant.


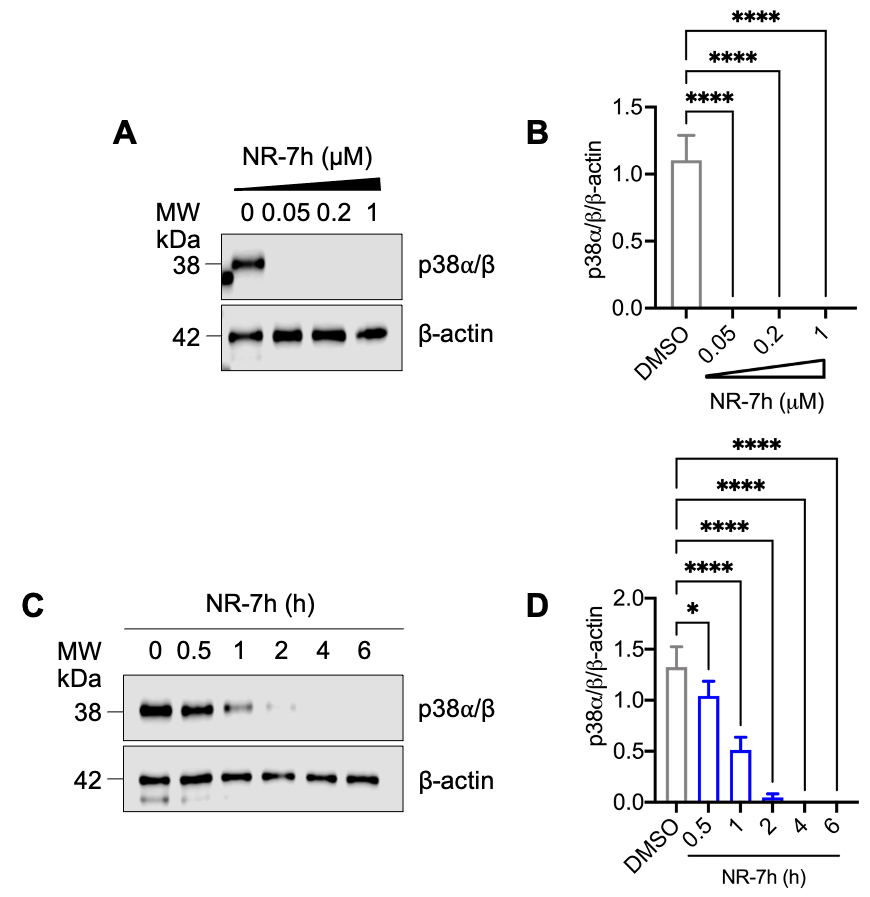


**Figure S3.** Knockdown of p38⍺ and p38β isoforms using the PROTACs compound NR-7h in HDFs. (**A**) HDFs were treated with increasing concentrations of NR-7h; after 24 h of incubation, p38⍺/p38β protein levels were analyzed using immunoblot. β-actin protein was used as a loading control. MW: molecular weight. kDa: kilodaltons. (**B**) HDFs were treated with NR-7h at a concentration of 1 µM; at different time points, p38⍺/p38β protein levels were evaluated as described above. (**C**, **D**) Densitometric analysis of p38⍺/p38β proteins was performed using ImageJ software and normalized with β-actin protein. Statistical differences were analyzed using the One-way ANOVA test: *p < 0.05 and ****p < 0.0001.

**References**

1. Hamel, R., et al., *Biology of Zika Virus Infection in Human Skin Cells.* J Virol, 2015. **89**(17): p. 8880-96.

2. Bektas, N., et al., *The ubiquitin-like molecule interferon-stimulated gene 15 (ISG15) is a potential prognostic marker in human breast cancer.* Breast Cancer Res, 2008. **10**(4): p. R58.

3. Stevenson, N.J., et al., *Ribavirin enhances IFN-alpha signalling and MxA expression: a novel immune modulation mechanism during treatment of HCV.* PLoS One, 2011. **6**(11): p. e27866.

4. da Conceicao, T.M., et al., *Essential role of RIG-I in the activation of endothelial cells by dengue virus.* Virology, 2013. **435**(2): p. 281-92.

5. Devhare, P.B., et al., *Analysis of antiviral response in human epithelial cells infected with hepatitis E virus.* PLoS One, 2013. **8**(5): p. e63793.

6. Chen, F., et al., *High-efficiency generation of induced pluripotent mesenchymal stem cells from human dermal fibroblasts using recombinant proteins.* Stem Cell Res Ther, 2016. **7**(1): p. 99.
